# Supplementary material for: A perylene monoimide probe based fluorescent micelle sensor for the selective and sensitive detection of picric acid
Source: Royal Society of Chemistry journal article supplement (doi:10.1039/d0ay01456g), 2020-01-01
Supplement: d0ay01456g1.pdf [file d0ay01456g1.pdf]

## Supporting information

### **A perylene monoimide probe based fluorescent micelle sensor for the selective and sensitive detection of picric acid**

Weiqing Li,<sup>ab</sup> Huipeng Zhou,<sup>\*a</sup> Muhammad Azhar Hayat Nawaz,<sup>ab</sup> Niu Niu,<sup>ab</sup> Na Yang,<sup>a</sup> Jia Ren,<sup>ab</sup> Cong Yu<sup>\*ab</sup>

<sup>a</sup> State Key Laboratory of Electroanalytical Chemistry, Changchun Institute of Applied Chemistry, Chinese Academy of Sciences, Changchun, 130022, China

<sup>b</sup> University of Science and Technology of China, Hefei, 230026, China

\* E-mail: hpzhou@ciac.ac.cn; congyu@ciac.ac.cn

## Synthesis of PMI-OH

### *PMI*

The mixture of 3,4,9,10-perylenetetracarboxylic dianhydride (2.0 g, 5.0 mmol), 2,5-di-tertbutylaniline (0.56 g, 3.2 mmol), Zn(OAc)<sub>2</sub>·2H<sub>2</sub>O (0.24 g, 1.1 mmol), imidazole (10.0 g, 147.0 mmol) and water (5 mL) was placed in an oven. The mixture was stirred at 190 °C. After 20 h, the reaction mixture was cooled to RT. The mixture was washed with water (3 x 150 mL) and dried. The crude material was dissolved in CH<sub>2</sub>Cl<sub>2</sub> (10 mL) and purified by column using CH<sub>2</sub>Cl<sub>2</sub>. The product was collected and the solvent evaporated to yield PMI as a bright orange crystalline solid (1.493 g, 62%). The NMR data were consistent with the reported data. <sup>1</sup>H NMR (500 MHz, CDCl<sub>3</sub>) δ 8.68 (d, J = 8.0 Hz, 2H), 8.50 (t, J = 8.4 Hz, 4H), 7.95 (d, J = 8.1 Hz, 2H), 7.68 (t, J = 7.8 Hz, 2H), 7.48 (dd, J = 10.9, 4.7 Hz, 1H), 7.35 (d, J = 7.8 Hz, 2H), 2.77 (dt, J = 13.7, 6.8 Hz, 2H), 1.18 (d, J = 6.9 Hz, 12H) (Fig. S1).

### *PMI-Br*

To a stirring solution of **PMI** (0.5 g, 1.04 mmol) in CH<sub>2</sub>Cl<sub>2</sub> (50 mL), Br<sub>2</sub> (0.278 mL, 9.73 mmol) was added dropwise. The reaction mixture was stirred at reflux for 2 h. The solution was cooled to room temperature and washed with a concentrated solution of Na<sub>2</sub>SO<sub>3</sub> (50 mL, 1 M), then extracted with water (3 x 300 mL). The solution was concentrated in vacuo and passed through a silica column with dichloromethane/petroleum ether 1 : 1. The **PMI-Br** solution was concentrated in vacuo to afford a red solid that was used without further purifications (425 mg, 73%). Mp: > 300 °C, <sup>1</sup>H NMR (500 MHz, CDCl<sub>3</sub>) δ 9.60 (d, J = 7.6 Hz, 1H), 9.39 (d, J = 8.4 Hz, 1H), 8.94 (d, J = 5.9 Hz, 1H), 8.70 (t, J = 8.1 Hz, 1H), 8.50 (dd, J = 12.8, 7.8 Hz, 1H), 8.43 (d, J = 6.8 Hz, 1H), 8.26 (d, J = 8.1 Hz, 1H), 7.99 (d, J = 8.4 Hz, 1H), 7.82 – 7.78 (m, 1H), 7.49 (t, J = 7.8 Hz, 1H), 7.35 (d, J = 7.8 Hz, 2H), 2.76 – 2.70 m, 2H), 1.18 (dd, J = 6.8, 3.2 Hz, 12H) (Fig. S2).

### ***PMI-OH***

A 125 mL Schlenk flask was filled with **PMI-Br** (100 mg, 0.19 mmol), Cs<sub>2</sub>CO<sub>3</sub> (430 mg, 1.32 mmol), H<sub>2</sub>O (1 mL), DMF (20 mL), and purged with N<sub>2</sub> for 10 minutes. The PMI-Br may not be dissolved easily until heat was applied. BINAP (10 mg, 0.016 mmol) and [Pd<sub>2</sub>(dba)<sub>3</sub>] (10 mg, 0.011 mmol) were added and the flask was quickly sealed with a greased glass stopper. The solution was heated at 90 °C for 2 hours after which a green solution was obtained. After cooling, the mixture was diluted with 200 mL of 1 M HCl, which caused a pink/purple precipitate to form. The suspension was filtered with a Buchner funnel and then washed with 500 mL of hot water. The solid was dissolved in a DCM / MeOH (3 : 1) solution and then dried using a rotary evaporator. The compound was then purified on a silica column using DCM : MeOH (3 : 1). The **PMI-OH** solution was concentrated in vacuo to afford a red solid that was used without further purification (58.5 mg, 62%). Mp: > 300 °C, <sup>1</sup>H NMR (500 MHz, DMSO-D<sub>6</sub>) δ 11.36 (s, 1H), 8.77 (d, J = 7.7 Hz, 1H), 8.69 (d, J = 8.0 Hz, 1H), 8.61 (d, J = 8.5 Hz, 1H), 8.51 – 8.49 (m, 2H), 8.46 (d, J = 7.8 Hz, 1H), 8.31 (d, J = 8.2 Hz, 1H), 7.72 – 7.67 (m, 1H), 7.46 – 7.42 (m, 1H), 7.32 (d, J = 7.8 Hz, 2H), 7.14 (d, J = 7.8 Hz, 1H), 2.65 – 2.62 (m, 2H), 1.06 (d, J = 6.7 Hz, 12H) (Fig. S3). <sup>13</sup>C NMR (151 MHz, DMSO-D<sub>6</sub>) δ 157.06, 146.56, 138.27, 137.61, 137.42, 137.36, 131.56, 131.22, 129.75, 127.79, 127.60, 127.17, 125.69, 125.49, 125.34, 124.17, 123.77, 123.70, 119.82, 118.85, 118.72, 118.33, 117.89, 116.94, 110.23, 33.68, 30.59, 29.27, 22.86. ESI-MS: m/z calculated for C<sub>34</sub>H<sub>27</sub>NO<sub>3</sub>, 497.2; found: 496.2, (M)<sup>+</sup> (Fig. S4). HRMS (ESI): calculated for 497.1991, found: 576.1007 ((MBr)<sup>-</sup>).

## NMR and mass spectra

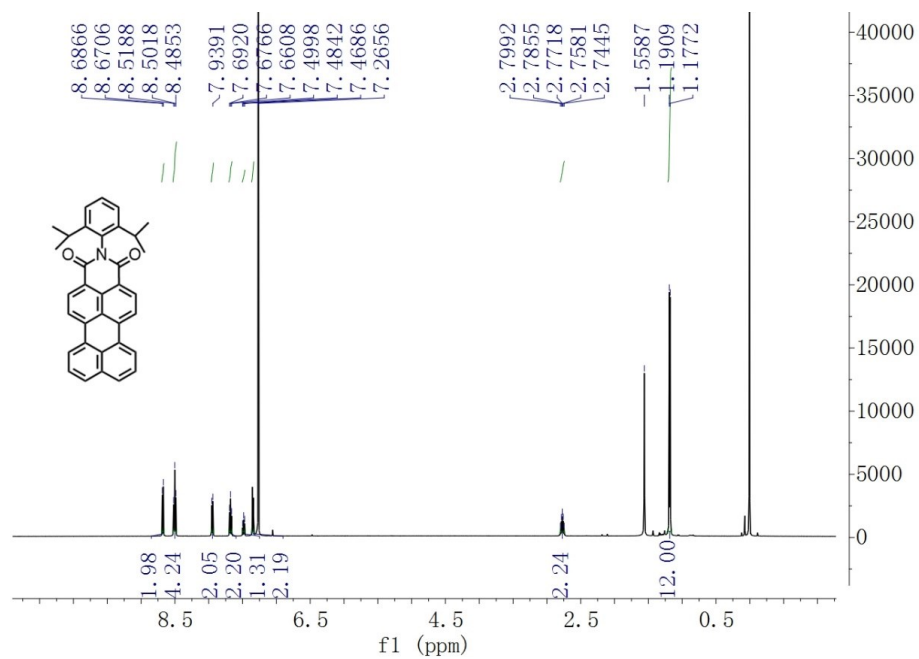

**Fig. S1** <sup>1</sup>H-NMR spectrum of PMI.

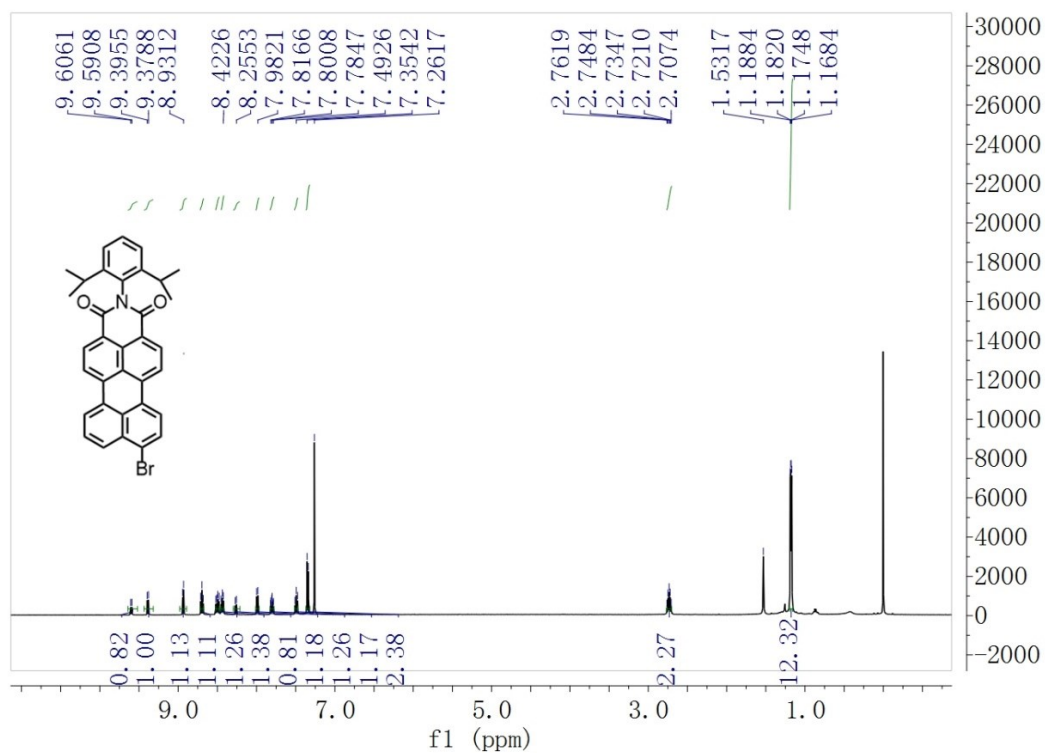

**Fig. S2** <sup>1</sup>H-NMR spectrum of PMI-Br.

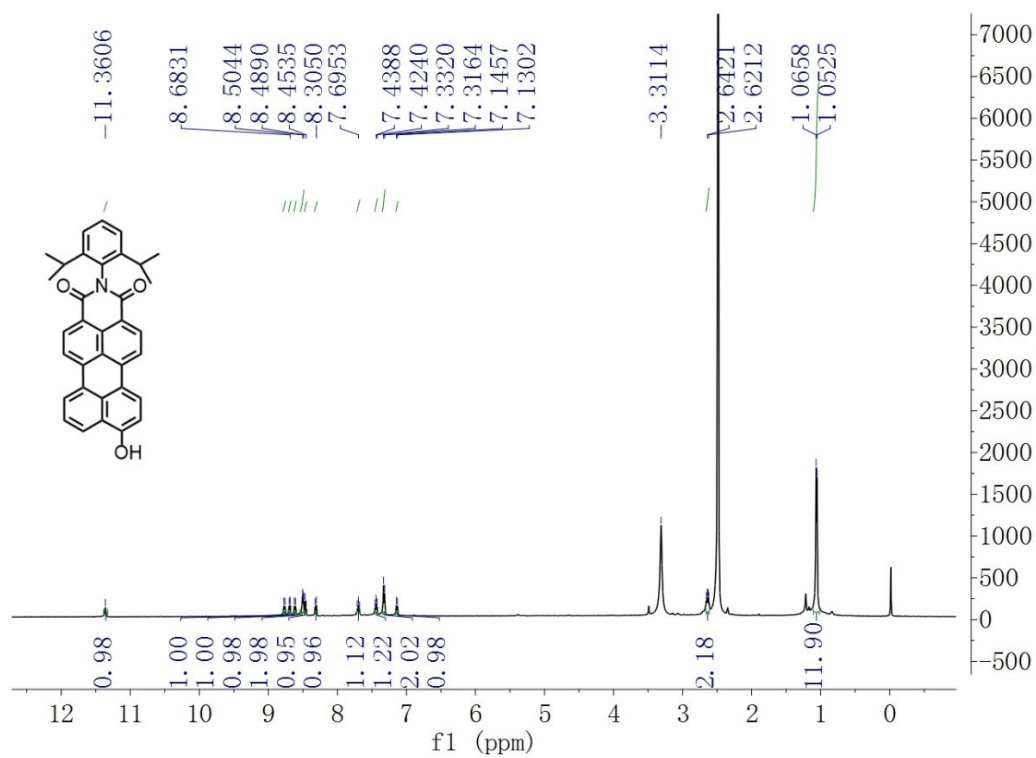

**Fig. S3**  $^1\text{H-NMR}$  spectrum of PMI-OH.

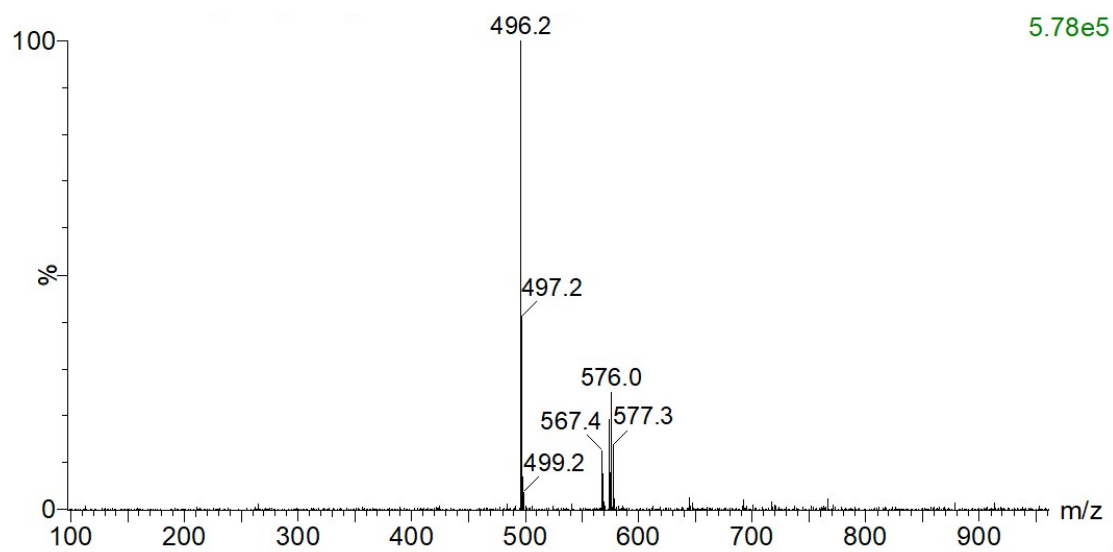

**Fig. S4** ESI mass spectrum of PMI-OH.

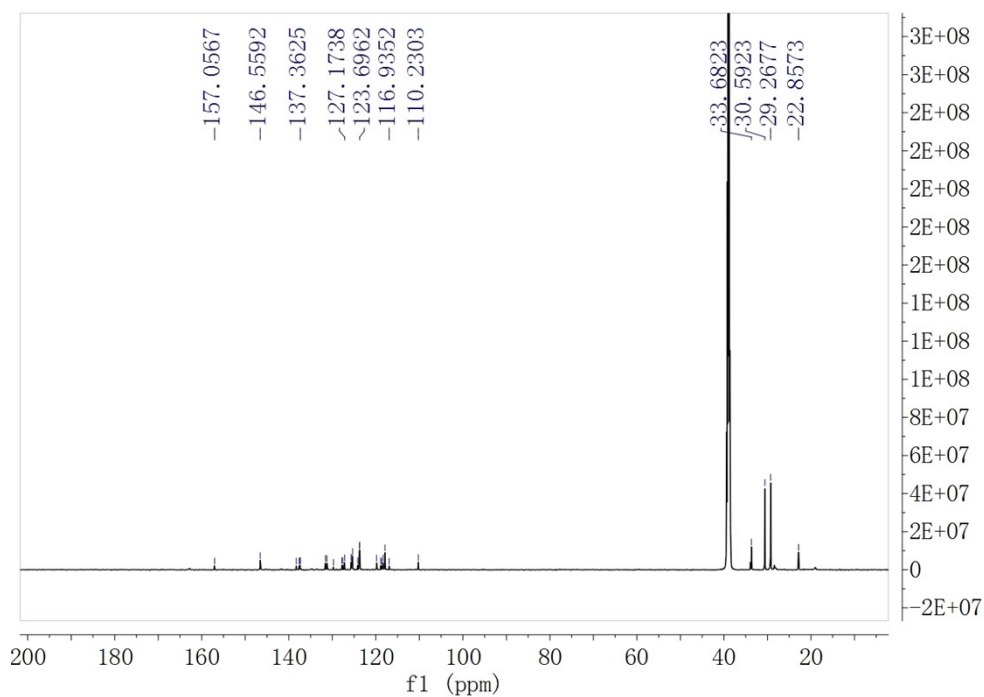

**Fig. S5**  $^{13}\text{C}$  NMR spectrum of PMI-OH in  $\text{DMSO-D}_6$  (600 MHz)

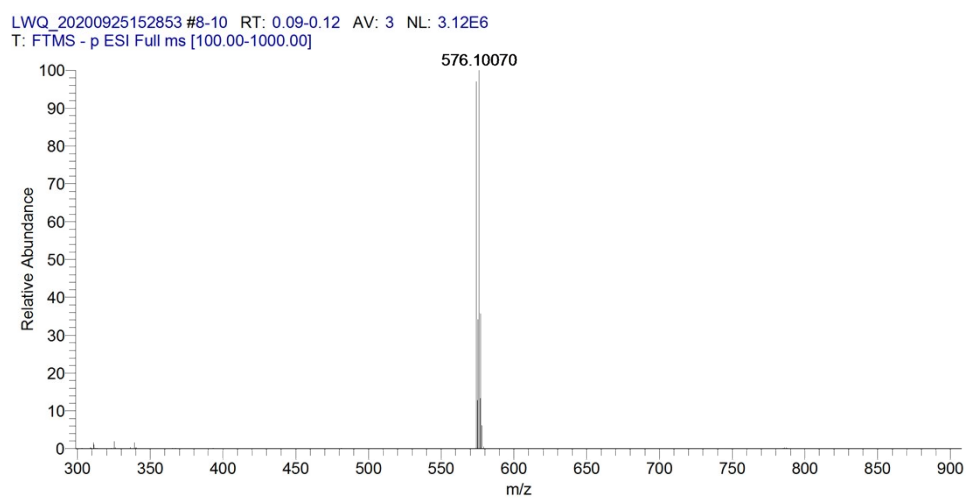

**Fig. S6** HRMS (ESI) spectrum of PMI-OH.

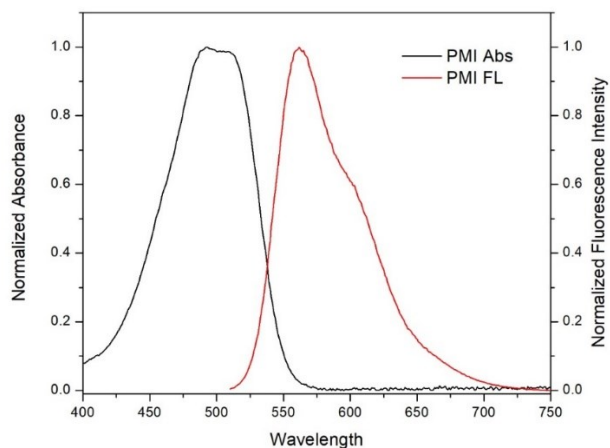

**Fig. S7** UV-vis absorption and fluorescence spectra of **PMI** (5  $\mu\text{M}$ ) in DMSO.

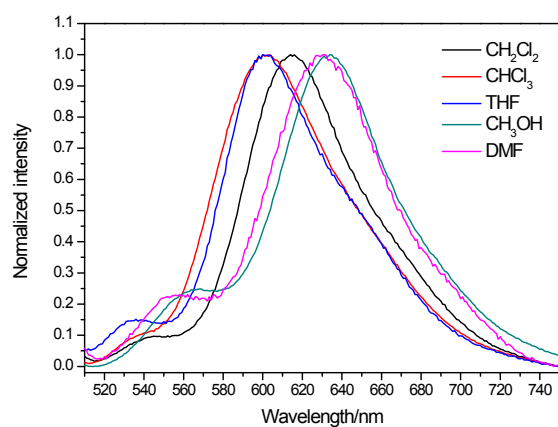

**Fig. S8** Fluorescence spectra of **PMI-OH** (5  $\mu\text{M}$ ) in  $\text{CH}_2\text{Cl}_2$ ,  $\text{CHCl}_3$ , THF,  $\text{CH}_3\text{OH}$  and DMF.

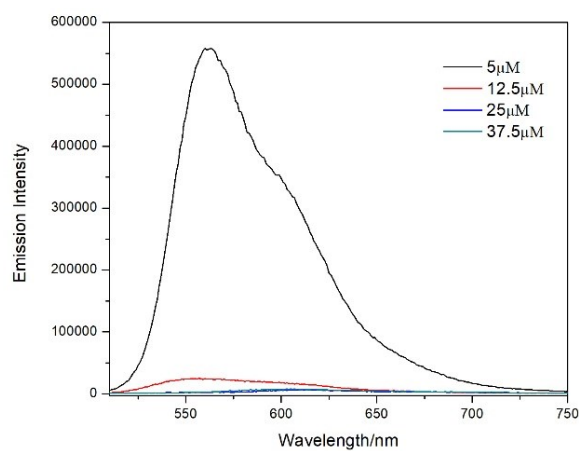

**Fig. S9** The fluorescence spectra of **PMI** at 5, 12.5, 25, and 37.5  $\mu\text{M}$  in DMSO.

**Table S1** Degree of quenching of **PMI-OH** (5  $\mu\text{M}$ ) excimer fluorescence in the presence of different percentage of  $\text{H}_2\text{O}$  in  $\text{H}_2\text{O}$  - DMSO solvent mixtures

| Water fraction<br>(v/v, %) | 10   | 20    | 30    | 40    | 50    | 60    | 70    | 80    | 90    |
|----------------------------|------|-------|-------|-------|-------|-------|-------|-------|-------|
| Quenching %                | 3.92 | 30.11 | 51.59 | 64.23 | 81.39 | 96.24 | 99.02 | 99.65 | 99.84 |

**Table S2** Comparison of selectivity,  $K_{sv}$  and detection limit towards PA in comparison with previous literatures

| Publications                                 | Selectivity | $K_{sv}(\text{M}^{-1})$ | Detection limit(M)    | Response with PA |
|----------------------------------------------|-------------|-------------------------|-----------------------|------------------|
| This work                                    | moderate    | $1.85 \times 10^5$      | $5.0 \times 10^{-7}$  | Turn-off         |
| J. Org. Chem. 2013, 78, 1306.                | moderate    | $3.80 \times 10^6$      | $1.5 \times 10^{-6}$  | Turn-off         |
| J. Mater. Chem. C, 2020, 8, 8257.            | high        | $1.54 \times 10^5$      | $6.1 \times 10^{-8}$  | Turn-off         |
| Talanta., 2020, 208, 120372.                 | high        | $3.22 \times 10^4$      | $1.2 \times 10^{-7}$  | Turn-off         |
| J. Org. Chem., 2015, 80, 4064.               | moderate    | $5.72 \times 10^6$      | $2.26 \times 10^{-8}$ | Turn-off         |
| RSC Adv., 2020, 10, 6497.                    | moderate    | /                       | $5.8 \times 10^{-8}$  | Turn-off         |
| J. Photoch. Photobio. A., 2020, 388, 112201. | high        | /                       | $2.4 \times 10^{-7}$  | Turn-off         |



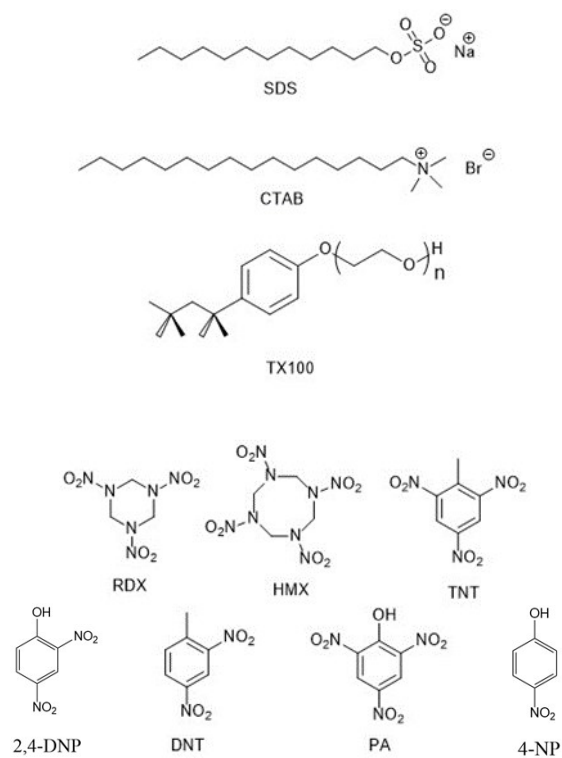

**Fig. S10** Chemical structures of the three surfactants and the explosives used in the present study.

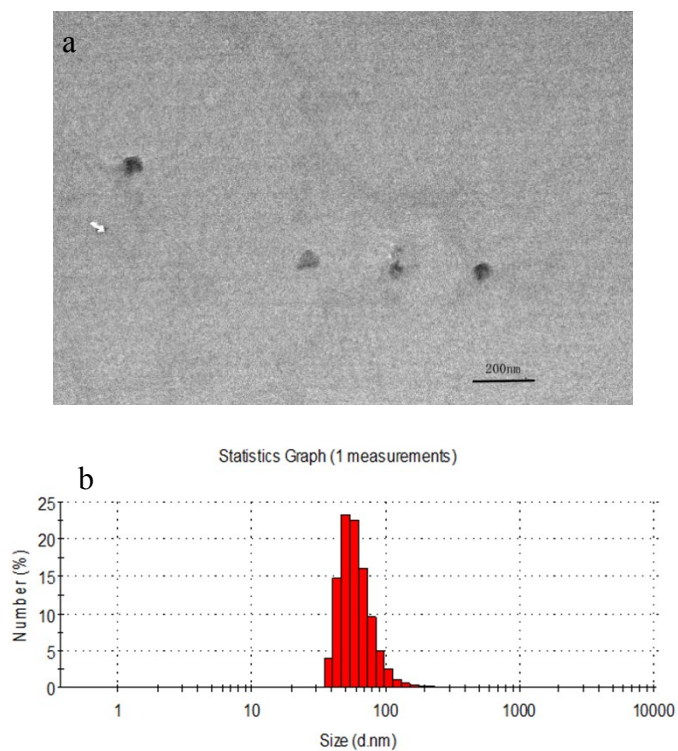

**Fig. S11** TEM (a) and DLS (b) of the PMI-OH@TX100 micelles in H<sub>2</sub>O / DMSO (9 : 1, v / v) solution.

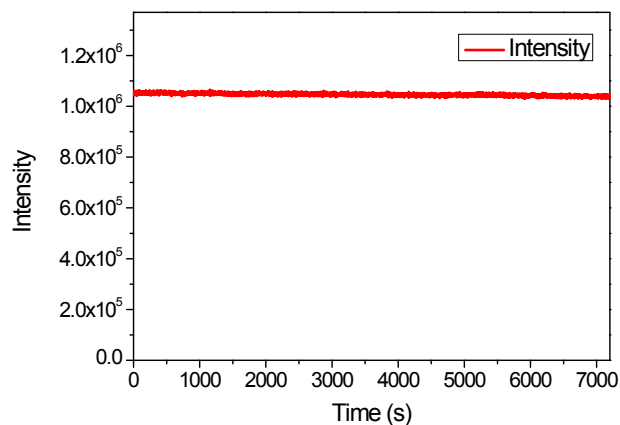

**Fig. S12** PMI-OH@TX100 micelles photostability in H<sub>2</sub>O / DMSO (9 : 1, v / v) assay solution. PMI-OH, 5 μM.

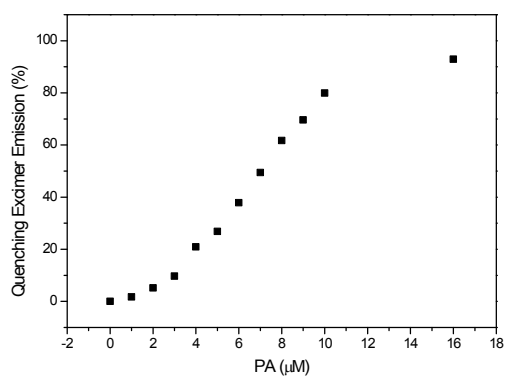

**Fig. S13** The fluorescence quenching efficiency at 630 nm with PA concentration. Assay solution, H<sub>2</sub>O / DMSO (9 : 1, v / v); PMI-OH, 5 μM.

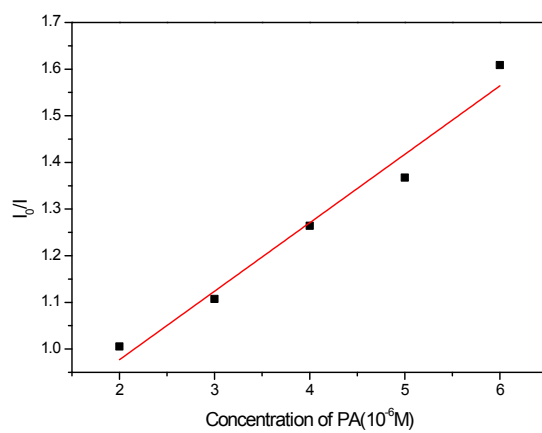

**Fig. S14** The Stern-Volmer plots of PMI-OH.

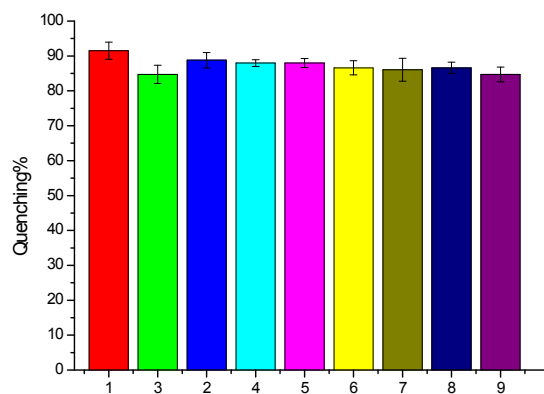

**Fig. S15** The fluorescence quenching efficiency of PMI-OH@TX100 micelles with PA in the presence of anions and cations, 1) No ions; 2) PbNO<sub>3</sub>; 3) ZnNO<sub>3</sub>; 4) NiCl<sub>2</sub>; 5) Na<sub>2</sub>SO<sub>3</sub>; 6) KCl; 7) NaH<sub>2</sub>PO<sub>4</sub>, 8) MnCl<sub>2</sub>; 9) NaBr. Ion concentration, 1 mM.

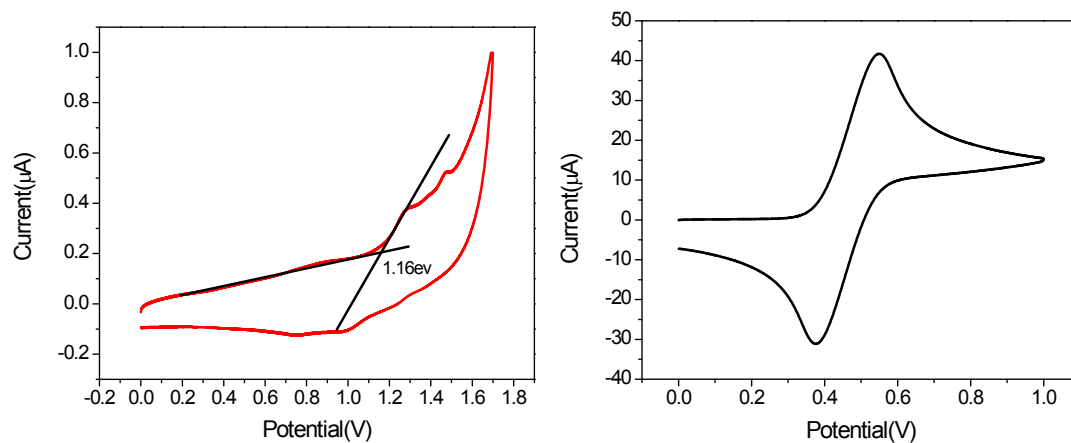

**Fig. S16** The cyclic voltammograms of PMI-OH (left) and ferrocene (right), scan rate = 50 mVs<sup>-1</sup>.
